# Supplementary material
Source: publisher figshare collection journal article supplement (https://sage.figshare.com/ndownloader/files/13370027)
Supplement: Supplementary file 1 [file 13370027]

## **HtrA3 isoform specific ELISAs for early detection of preeclampsia**

Yao Wang<sup>1,2</sup>, Ying Li<sup>1,2</sup>, Jonathan Hyett<sup>3,4</sup>, Fabricio da Silva Costa<sup>5,6</sup> and Guiying Nie<sup>1,2,7,\*</sup>

<sup>1</sup>Implantation and Placental Development Laboratory, Centre for Reproductive Health, Hudson Institute of Medical Research, Clayton, VIC, Australia;

<sup>2</sup>Department of Molecular and Translational Sciences, Monash University, Clayton, VIC, Australia;

<sup>3</sup>Central Clinical School, University of Sydney, Sydney, NSW, Australia;

<sup>4</sup>RPA Women and Babies, Royal Prince Alfred Hospital, Sydney, NSW, Australia;

<sup>5</sup>Monash Ultrasound for Women, Melbourne, VIC, Australia;

<sup>6</sup>Department of Obstetrics and Gynaecology, Monash University, Clayton, VIC, Australia;

<sup>7</sup>Department of Biochemistry and Molecular Biology, Monash University, Clayton, VIC, Australia;

Running title: HtrA3 isoforms for early detection of preeclampsia

\*Corresponding author: Guiying Nie

<sup>1</sup>Implantation and Placental Development Laboratory, Centre for Reproductive Health, Hudson Institute of Medical Research, 27-31 Wright Street, Clayton, VIC 3168, Australia

Phone: +61 3 8572 2550

Email: [guiying.nie@hudson.org.au](mailto:guiying.nie@hudson.org.au)

**Keywords:** HtrA3, isoform, preeclampsia, preeclampsia subtypes, early detection

## Supplementary Material

**Supplemental Table 1. Characteristics of HtrA3 monoclonal antibody (mAb)**

| HtrA3 mAb<br>name | Detection of HtrA3 isoforms |         |
|-------------------|-----------------------------|---------|
|                   | HtrA3-L                     | HtrA3-S |
| 2C4               | +                           | +       |
| 9C9               | +                           | +       |
| 10H10             | +                           | +       |
| 3E6               | +                           | -       |
| 6G6               | +                           | -       |

**Supplemental Table 2. Linearity test for the newly established HtrA3 ELISAs**

Conditioned media (CM) from HEK293 cells transfected for the HtrA3-L or HtrA3-S isoform, and a pooled serum sample of first trimester pregnancy, were assayed in different dilutions and the percentage of recovery was calculated.

**HtrA3-T ELISA**

| Sample     | Dilution | Observed concentration (pM) | Expected concentration (pM) | Recovery |
|------------|----------|-----------------------------|-----------------------------|----------|
| HtrA3-L CM | 1/2      | 5683                        | 5683                        | 100%     |
|            | 1/4      | 5255                        |                             | 92%      |
|            | 1/8      | 4702                        |                             | 83%      |
| HtrA3-S CM | 1/2      | 3763                        | 3763                        | 100%     |
|            | 1/4      | 4188                        |                             | 111%     |
|            | 1/8      | 4419                        |                             | 117%     |
| Serum      | 1/10     | 11329                       | 11329                       | 100%     |
|            | 1/20     | 12490                       |                             | 110%     |
|            | 1/30     | 13168                       |                             | 116%     |

**HtrA3-L ELISA**

| Sample     | Dilution | Observed concentration (pM) | Expected concentration (pM) | Recovery |
|------------|----------|-----------------------------|-----------------------------|----------|
| HtrA3-L CM | 1/2      | 3520                        | 3520                        | 100%     |
|            | 1/4      | 3212                        |                             | 91%      |
|            | 1/8      | 2768                        |                             | 79%      |
| HtrA3-S CM | 1/2      | 0                           | 0                           |          |
|            | 1/4      | 0                           |                             |          |
|            | 1/8      | 0                           |                             |          |
| Serum      | 1/5      | 3465                        | 3465                        | 100%     |
|            | 1/10     | 3762                        |                             | 109%     |
|            | 1/15     | 4518                        |                             | 130%     |

### **Supplemental Table 3. Spike and recovery test for the two HtrA3 ELISAs**

Recombinant HtrA3-L protein was spiked in an HtrA3-negative human serum sample and assayed by the HtrA3 ELISAs.

#### **HtrA3-T ELISA**

| Spike level | Observed concentration (pM) | Expected concentration (pM) | Recovery |
|-------------|-----------------------------|-----------------------------|----------|
| High        | 1499                        | 1500                        | 100%     |
| Medium      | 752                         | 750                         | 100%     |
| Low         | 370                         | 375                         | 99%      |

#### **HtrA3-L ELISA**

| Spike level | Observed concentration (pM) | Expected concentration (pM) | Recovery |
|-------------|-----------------------------|-----------------------------|----------|
| High        | 1500                        | 1500                        | 100%     |
| Medium      | 750                         | 750                         | 100%     |
| Low         | 373                         | 375                         | 100%     |

**Supplemental Table 4. Intra- and Inter-assay variations of the two HtrA3 ELISAs on standards and quality controls for serum detection**

**HtrA3-T ELISA**

| Nominal HtrA3 concentration (pM) | Intra-assay %CV | Inter-assay %CV |
|----------------------------------|-----------------|-----------------|
| 1500                             | 12%             | 5%              |
| 750                              | 4%              | 4%              |
| 375                              | 4%              | 3%              |
| 187.5                            | 7%              | 4%              |
| 93.76                            | 8%              | 6%              |
| 46.88                            | 13%             | 67%             |
| Quality controls                 |                 |                 |
| High                             | 2%              | 10%             |
| Medium                           | 4%              | 22%             |
| Low                              | 4%              | 17%             |

**HtrA3-L ELISA**

| Nominal HtrA3 concentration (pM) | Intra-assay %CV | Inter-assay %CV |
|----------------------------------|-----------------|-----------------|
| 1500                             | 2%              | 0%              |
| 750                              | 3%              | 0%              |
| 375                              | 5%              | 1%              |
| 187.5                            | 5%              | 3%              |
| 93.76                            | 6%              | 5%              |
| 46.88                            | 12%             | 19%             |
| 23.44                            | 14%             | 82%             |
| Quality controls                 |                 |                 |
| High                             | 3%              | 7%              |
| Medium                           | 3%              | 6%              |
| Low                              | 4%              | 9%              |

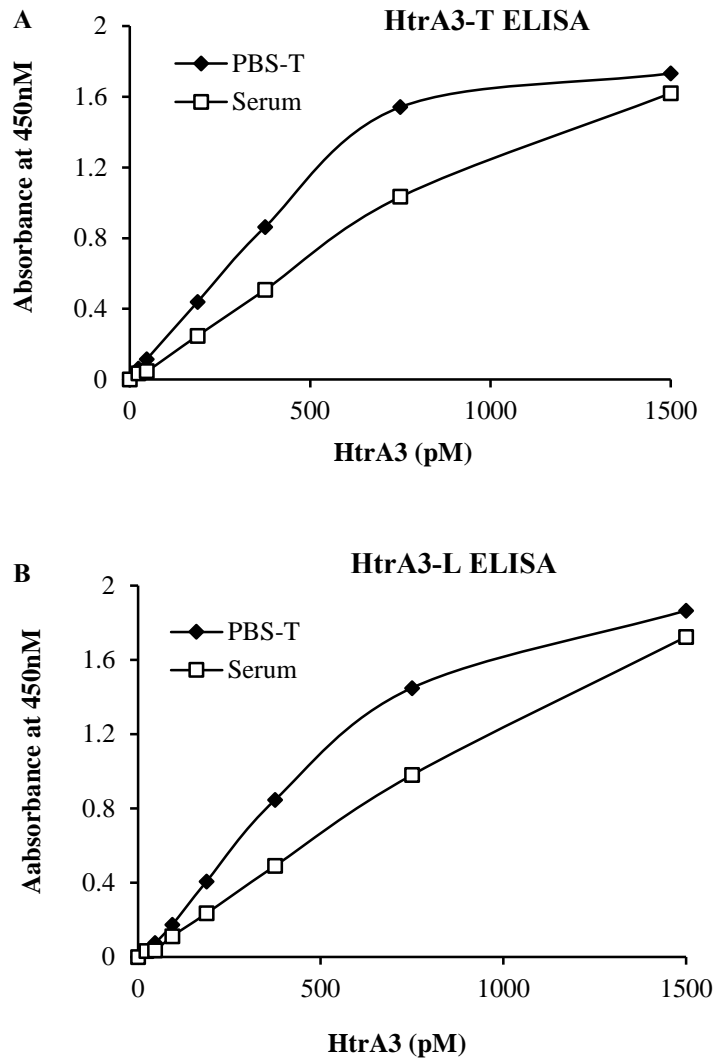

**Supplemental Figure 1. Representative standard curves of HtrA3 ELISAs in buffer and serum.** (A) HtrA3-T ELISA, (B) HtrA3-L ELISA. Serum matrix dampened the signals and modified the characteristics of the standards in both HtrA3 ELISAs.

**A**

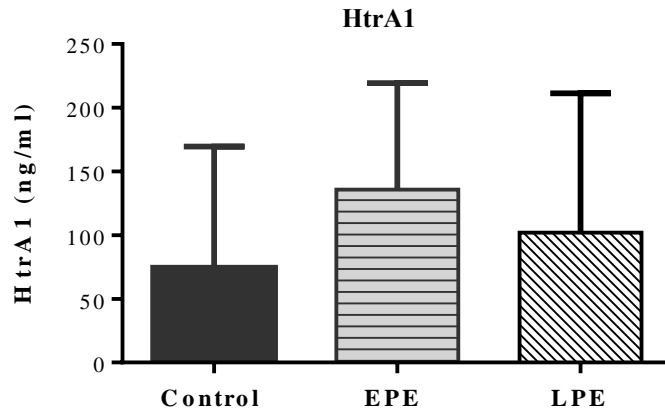

**B**

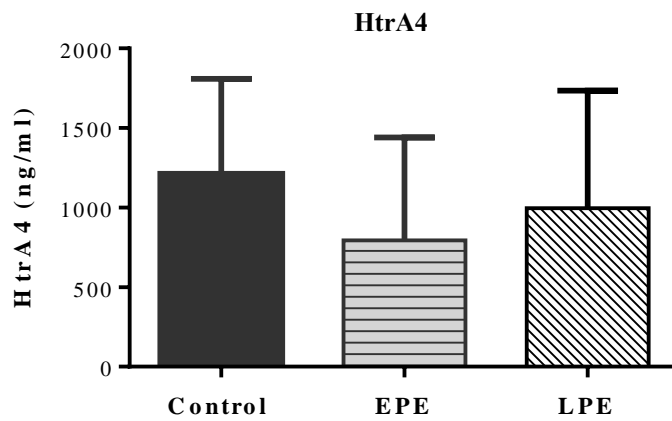

**Supplemental Figure 2. Serum levels of HtrA1 and HtrA4 at 11-13 weeks of gestation in women who proceeded to term without complication or developed PE in the third trimester. (A) HtrA1. (B) HtrA4. Identical samples assayed for HtrA3 (Figure 3) were analyzed for HtrA1 and HtrA4 respectively. Control, n=292; early-onset PE (EPE), n=5; late-onset PE (LPE), n=36. Data are expressed as median  $\pm$  interquartile range.**
